# Supplementary material for: Thermal stress induces tissue damage and a broad shift in regenerative signaling pathways in the honey bee digestive tract
Source: Oxford University Press journal article supplement (doi:10.1242/jeb.242262), 2021-09-06
Supplement: jeb242262supp.pdf [file jeb242262supp.pdf]

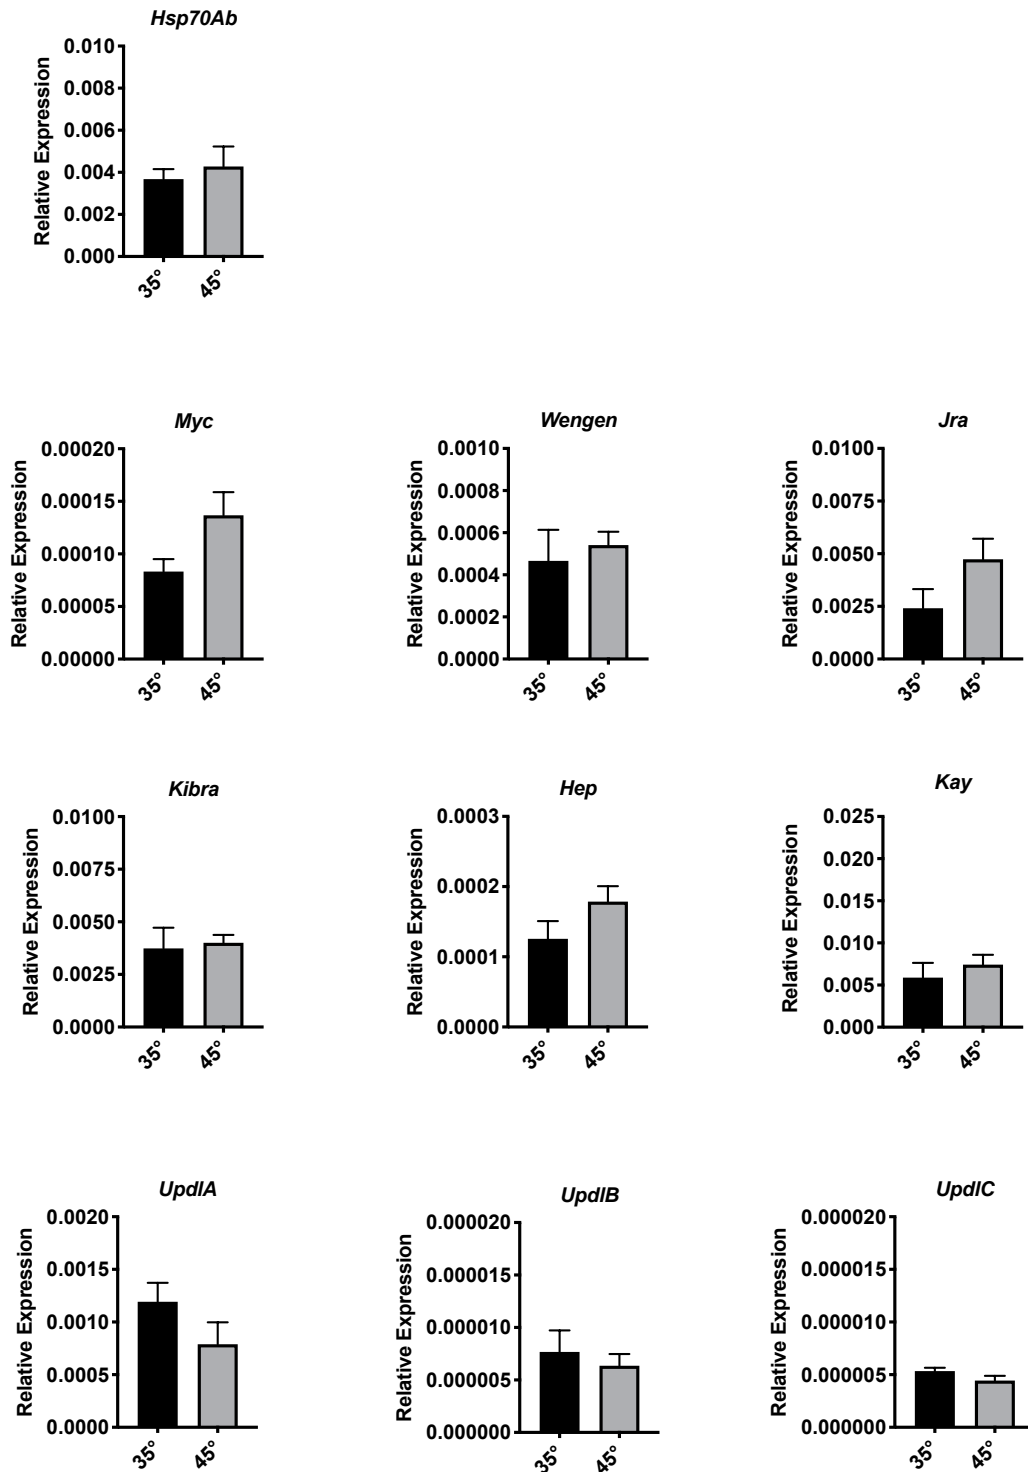

**Fig. S1.** Transcript levels of *Hsp70Ab*, *Myc*, *Wengen*, *Jra*, *Kibra*, *Hep*, *Kay*, and the *UpdI* genes *UpdIA*, *UpdIB*, and *UpdIC* relative to b-actin in midgut, from bees maintained for four hours in cages at either 35 °C or 45 °C and then recovered at 35 °C for 20 additional hours. Symbols represent expression values of the genes of interest calculated using the  $2^{-(\text{DCT})}$  method for individual bees. Mean  $\pm$  SEM is also shown. Statistical significance is noted as \* $p < 0.05$ , and \*\* $p < 0.01$ .

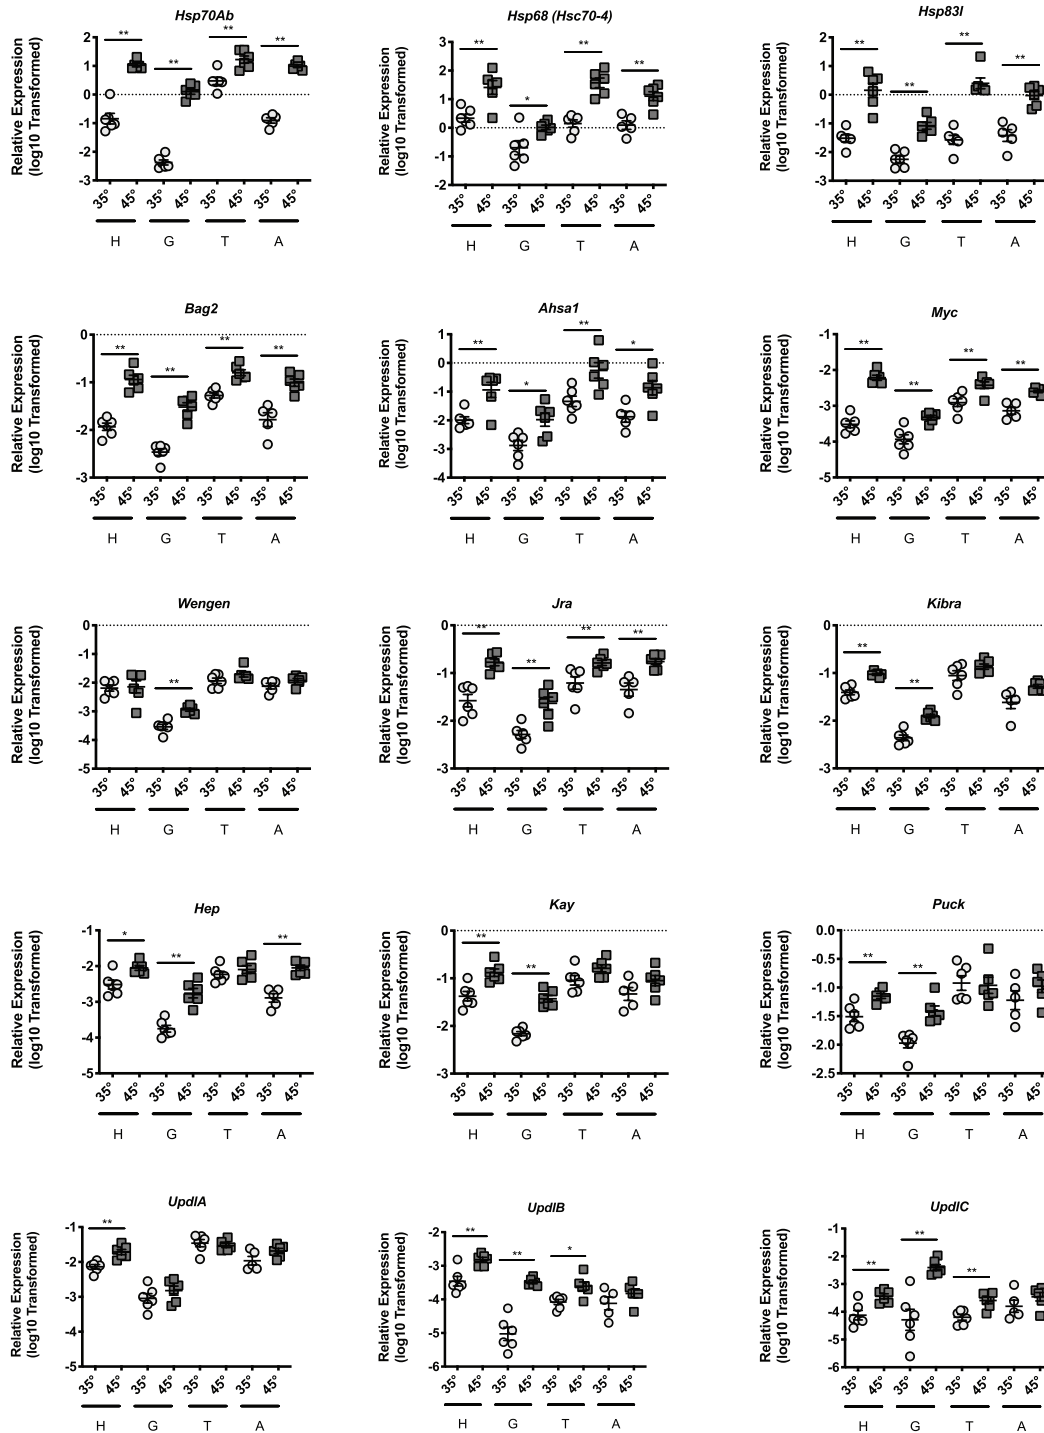

**Fig. S2.** Transcript levels of protein folding genes *Hsp70Ab*, *Hsc70-4*, *Hsp83l*, *Ahsa1*, *Bag2*, Hippo pathway associated genes *Kibra*, *Myc*, and *Wengen*, JNK pathway associated genes *Jra*, *Hep*, *Kay*, and *Puck*, and the Updl genes *UpdIA*, *UpdIB*, and *UpdIC* relative to b-actin in head tissue (predominantly brain, sensory organ tissue, and hypopharyngeal glands), midgut, thorax tissue (predominantly flight muscle), and abdominal wall (predominantly fat body) from bees maintained for four hours in cages at either 35 ° or 45 °C. Symbols represent expression values of the genes of interest calculated using the  $2^{-(\text{DCT})}$  method for individual bees after Log<sub>10</sub> Transformation. Mean ± SEM is also shown. Statistical significance is noted as \*p < 0.05, and \*\*p < 0.01.

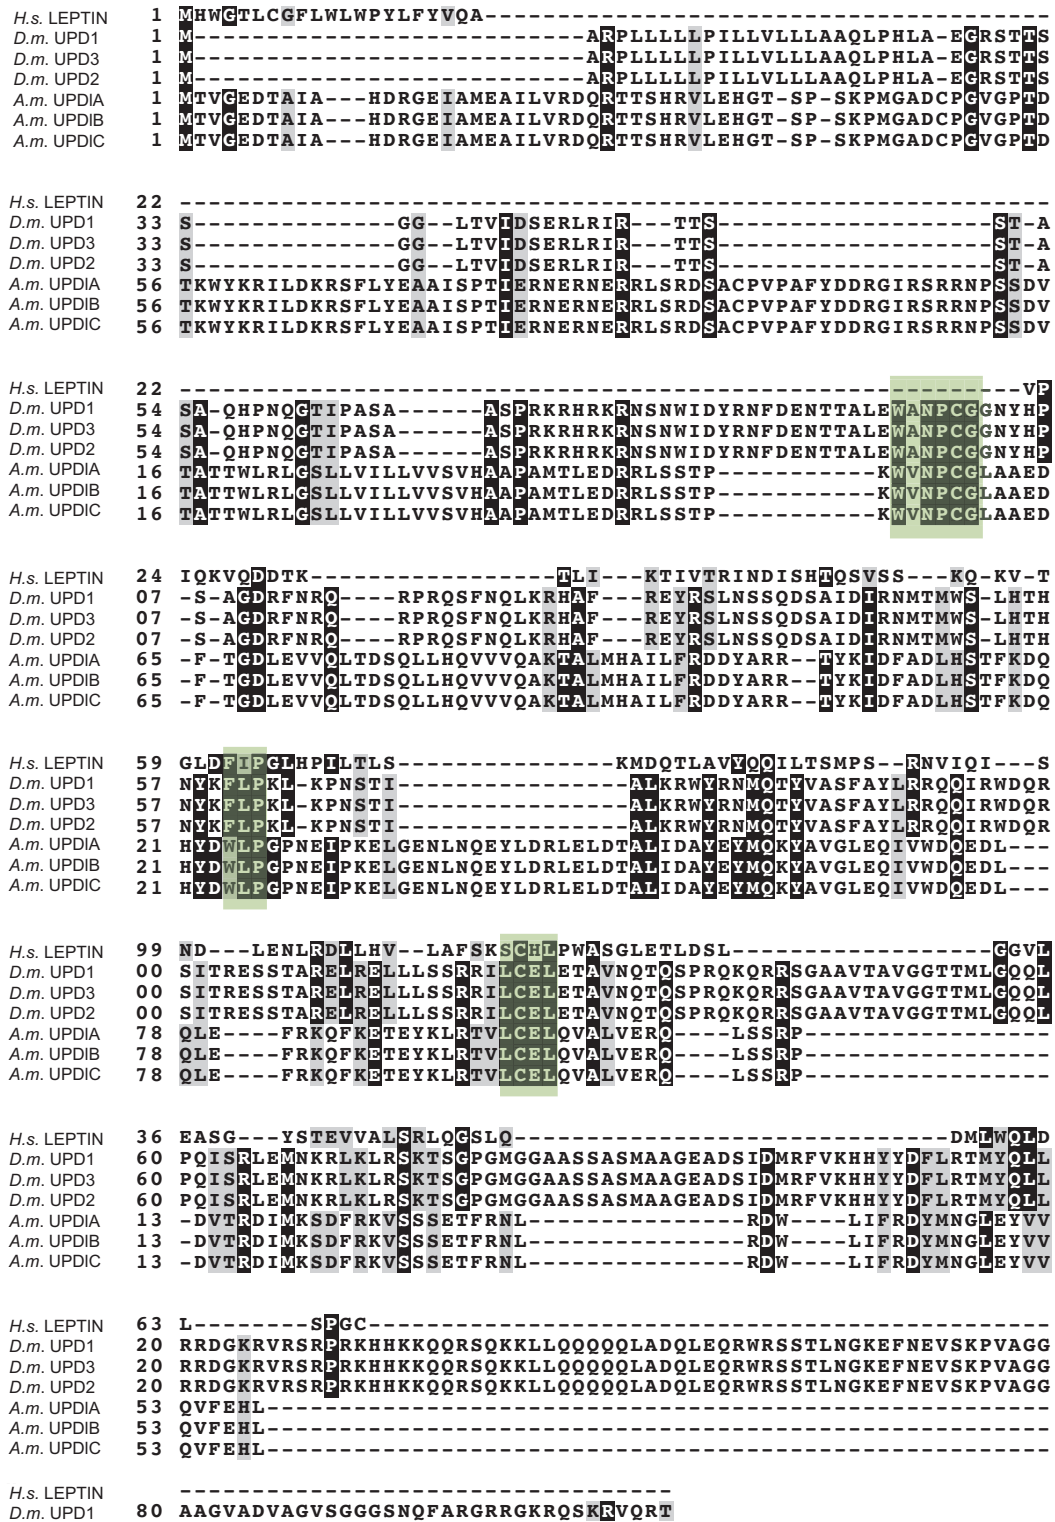

**Fig. S3.** Protein alignment of UPD proteins from fruit fly (*Drosophila melanogaster*), the UPDI proteins from honey bee (*Apis mellifera*), and the *Homo sapiens* LEPTIN protein. The highly conserved Wxxx motif, W/FJP motif, and LC-containing motif are highlighted by green boxes.



TTTCCATTTTTCAACGAGTTTTAAAAAATGTTAATGATTACGAATTAATGATTATCCTTATCCTTATCCTTCCATCGATGTG  
 CAAAAATTTGAAAAATTTTTTTTAAACAAAAAACGAAGACGAAAGGTGTTTCGTTTATGTTATAGTTTCTTTTTTATGCATT  
 ATGGATACGAAGAGTGCAAAAAATAAAATAAACAAACAACGAAAAATTTTTCTCAAAAAATAAATTGAAACGGAACACTTTT  
 CCGTTTTAAAAATAAATAATGTGATGGAATAAGCTACGATAAGATTAAGATTAAGATTATTATCATTACACTTATAATTTATAC  
 CATATACGTAAATCTCTGA **AAATGCAA** TAATTGAAGTTCGGTTATCAGGATAATTTATTCTAATATGGATCGAACAAAATAT  
 TCGCTTCACGATGGATATATAACGGAAAATATTGACAAGTTCAACTGTATCAACGACTGTTGTTAG **AAATGCAA** AATGTGT  
 CTGAGCGACCGATTTTCCGGAAAAATACGTTTCGCGCGGTTTTTCCAAAGCCAAATTTCTAGTCACGAACGAGCAAGAACTTT  
 TTGCCAACGAATTATCAAAAGTGCAACGGTCAT **TTGTATA** AATTATATTTTTTTTTTTTTCTTTTAGAAAAATCGAAGAGAATC  
 GAAAGAGATGAAAAGAATCCTTTAAACGAACGAAAAAATAAGAGAACGTTATTGTTGGTTG **AGTAAAA** GTTGCAACA  
 GCTAATATAGTGGGAAAAACGAGGTGAATTATCGGGAATAAAATCAGAAGGAATGATGTCAGAGCACAGGTAGAATTAGAGA  
 TAAACGAAAAATGTTGGGAGATATCTAACGATCGAAGGCACCACCTTCTGAATTGTCAATCAGCTAGTAATACTTCCAAGAAA  
 GTGGCGGCGTCAAAGACTTAATCTTATTAGAACGTGTGCAAAATCGCTGCACGGGGATCTTATTGGCCGAGAGGAGAAGATAG  
 CGAAGACGCCACAACGTGCACGCTTATATAGTACTCTAGTAGTGCTATGCGGTGTTTCATTTCATAGTTCCACTCCAGTCTAG  
 TCATTTCATTAATCCGATACGGCGAGAGTGTCTTACAGAGCGTGCGTGATCAGACTCCCGATCGTTCGAGTGACCCCTT  
 CGAGTTCGCGCGCCCGTGCATG

**LOC102655202 (*Upd1C*)**

AATATTATTACTGATAAATTTATTAATCGAAACTTTTCGTCATTGTCATTTAATTTTTTACGTGGAGCTGTTCCGGCCTTTT  
 TATCGAAAAATAACCCGAACCGATCCAGTATCAGGCGTACACGAACGGTAGGAAAGTTGTAATTT **TATATTCAT** TACTAT  
 TTCGCGCTCGTAAATGTTTGTACATGTAATGATGCGTCAACGCAACAATTTTTCAATGTATCGTATCTTTTTTTTTAACATT  
 AGATTTAAAAAACTTATTCCTTATTTACAATAT **TATATACAT** AGTAGCTATATATATATATAGATAAAAAATCAAAAAATATAA  
 AAAATCAATATATATGATAAAATCAATAAAATTAATATGAGTAATTTATATTTAATATTATGATATAAATAAACGATTTA  
 AAATTGTTTTCTGATTAACCTGATTAGATAGG **AAATACAA** ATGAAGTACTTTTCATTTTATCATTTTCACCTATAATTTCTAATTTTT  
 AATTCATTTATTTTCATATAAATGTAATCTTAAATTTTGATTGAAATTAATTTTCATTCGAAATTTGTTGGGGCAAAGTTAAAAAGG  
 GATCGTGTGTAAT **ATGAATCT** ATCGTTTGTTCGTTTGGATATTGATGCGCGCGATTATACCCGGAATACCCGATGGCGTTAA  
 TTCAATCTCGTGTGAGAAGATCCAATTTTAGTTTCGATAAATCTGCCGACGGTCTAATTTATAGCATCACCATATATGGTACAT  
 ATCTCTACACTACTACGTACCATATGTCAAGCGTTGATACAGAATGCGTACGCTGTGAGCGAGTAGACTTCATTCACAGT  
 TTTACGTACACGTTCAACTTAATCGTTCAGCTGTGATGCAAAAGTATTGACATCTTTGACGTCAATTTTTTCCCATCGCTTT  
 CTTACGTTCCTTTCGTTCCCTTTTCGTACCTTGCGAATATACGGTTCAAGCTTTCCCTACAAAATCTAGCCGATACTTTCGTT  
 TTACTGTTAATTTAATTTCCCCACGAGAAATTTTGAACGATTCCTTTCCAATTTTCAATTCAAA **TATATTCAC** GAAGGATAT  
 TATTATTTAATGTGAATCGAGTCATGAATTATGAA **AGGAATAT** TATCTTATTACAACCGCAAAGTTAATAATTCACGGTA  
 CGTTTC **AAATTCAA** TTCAATCCTATATTGCGGTCTTTGATTTAAATTTGTAACCTCGAGCATCAATATTTTTTTTATGTCTAACG  
 CGTGGATTTTCCAAAAAATGCTACGAAATCTGATGGATTTCGCGAATATGCGCGATCAGCATCGCCGATTTTTCGAAGAGAAT  
 CCAAGAGATCTATAAATACGGAAGAAAGTGCAGAAATATCTGGAATTAATACATATTTACTTACTCGAATTTTAATAAAC  
 ACATCATATATATAAATTTATAAATTTATATTTATAAATTTAGAAAAAGATACGATGTTATCTTGTTCATTTGAAAAATCGA  
 AAGGTCGTTAAGAAATTAGAAAGAAATCACAAAATCGAGTTATTTATGTAATTTATAAAAAATATATAGATATATCAATATAGA  
 AATAAAATAAAAGATGATAAAAGGAAATAAAATATATAGGAAAAATATAAAGATATAAATAAGATGTAAGATATAAGATAAT  
 TAATATATAAGAAATAAATATATAAGATATAATTTGATATAGATATAAAAAATATAGATATAAAGATATTTTATAAACTATAATAA  
 ACATAGTAATAATTAAGAAATAAAAAAGGAAAAATAAATAAATTTTCGCGAGATAAATTCATCGTAATTGAGAAACAAAATATT  
 TGAAACGACGATGGTGAATTAATAATTTGATTTAATCAATCATGTGAAGCACCGTTTCCATTGCGAAACTCGGTGAATACCCGCG  
 GCACTACATTTAGACATTTCTACCAACTGTAAAAAATTTATTCGAGAACAAATTTGTGGTGAATTTATGCGAACCAATCTGGAC  
 GTAGG **TCGGTATTT** TTGAAAAAATAAATCGTTTTCGAAGAAGAAGACTCGGATGTGATTCATGGAGTTTATCGAAACGGCTG  
 AAAAGTTCGACAAAATATAAGCCGTCGTCGCTCCGCTAACGTCGCTAGGTACGCTTGATTTGTTTACACAATC **TCGGTATATA**  
 AGAAGGTTTGAAGATTCGACAATCTCAGTTTCAATCTCACGCCAATCGGTAGCATCGCTTTAACGAAATTTGTTCCTTTTCGA  
 TCGATTTTAAATATAAATTTCTAATCTAAATTTACCCGAGTTTCGCAAATCGTTTCGATTCGTAAGAAAAAGTTTCTAAAAGTTT  
 AATTCACAT **TTCTAGAAATTC** AATCTTAAACATG

**Fig. S4.** Promoter regions of *Upd1A*, *Upd1B*, and *Upd1C* genes along with key predicted transcriptional factor binding sites.

**Table S1.**

[Click here to download Table S1](#)

**Table S2. Updl genes and UPDI proteins in different bee genomes**

[Click here to download Table S2](#)
